# Supplementary material for: Revised classification and catalogue of global Nepticulidae and Opostegidae (Lepidoptera, Nepticuloidea)
Source: Zookeys. 2016 Oct 31;(628):65–246. doi: 10.3897/zookeys.628.9799 (PMC5126388; doi:10.3897/zookeys.628.9799)
Supplement: Supplementary material 1 — Specimen data for Catalogue of Nepticuloidea with BOLD data [file zookeys-628-065-s001.xls]

## Sheet: Sheet1
Supplementary File 1 belonging to:	Nieukerken EJ van, Doorenweerd C, Hoare RJB, Davis DR (2016) Revised classification and catalogue of global Nepticulidae and Opostegidae (Lepidoptera: Nepticuloidea). ZooKeys
Specimen data for Catalogue of Nepticuloidea
catalogNumber	identifiedBy	basisOfRecord	BarcodeIDentificationNumber	scientificName	identificationQualifer	individualCount	Sex	LifeStage	CollectedStage	Country	stateProvince	AdminDivision2	AdminDivision3	Locality	Collector	ExactStartingDate	ExactEndingDate	DateVerbatim	dateOfEmeregenceStart	dateOfEmeregenceEnd	EventId	EventIdVerbatim	otherCatalogNumber	Notes	typeStatus	EarlierIdentification	CollectionDetail	Habitat	Method	institutionCode	CollectionNote	HostName	HostVerbatim	HostIdentificationQualifer	HostIdentifiedBy	MicroscopicPreparation	AssociatedPreparations	PartsPrepared	PreparationMedium	PreparationMaker	PreparationDate	dateIdentified	verbatimCoordinates	verbatimCoordinateSystem	georeferenceSources	geodeticDatum	decimalLatitude	decimalLongitude	minimumElevationInMeters
RMNH.INS.24848	E.J. van Nieukerken	PreservedSpecimen		Acalyptris Aldabra		1	1 male	adult	adult	Seychelles				Aldabra	M. Gerber	1959-12-18							'268'	Misidentified paratype	Paratype	Stigmella tropicatella Legrand				MNHN, Muséum National d'Histoire Narurelle, Paris						EvN4848		Male genitalia	euparal	E.J. van Nieukerken	2016-05-03	1602			google earth		-9.47	46.27
RMNH.INS.24650	E.J. van Nieukerken	PreservedSpecimen	BOLD:ACU7486	Bohemannia manschurella		1	1 male	adult	adult	Japan	Honshu	Nagano ken	Matsumoto-shi	Shirakabe-toghe [=Sh-pass]	Nagao Hirano	2012-06-27														RMNH, Naturalis Biodoversity Center						EvN4650		Male genitalia	Euparal	E.J. van Nieukerken	2014-10-24	1504			google earth		36.11	137.66	1600
	E.J. van Nieukerken	PreservedSpecimen		Bohemannia manschurella		1	1 male	adult	adult	Russia	Primorye			V. Ussuriskij bio. st. Berezovyi sok	Jalava, Kullberg & Kaare	1998-07-31	1998-08-05													MZH, Finnish Museum of Natural History, Helsinki						JCK15270		Male genitalia	euparal	JC Koster	2011-02-01	1102	44.02N-134.12E	Degrees Minutes	label		44.03	13	550
	E.J. van Nieukerken	PreservedSpecimen		Bohemannia manschurella		1	1 female	adult	adult	Japan	Honshu	Nagano ken	Matsumoto-shi	Shirakabe-toghe [=Sh-pass]	Nagao Hirano	2012-06-27														RMNH, Naturalis Biodoversity Center												1504			google earth		36.11	137.66	1600
	E.J. van Nieukerken	PreservedSpecimen		Bohemannia manschurella		1	1 female	adult	adult	Japan				Odaira	P. Savolainen	1954-08-04														MZH, Finnish Museum of Natural History, Helsinki						JCK15090		Female genitalia	euparal	JC Koster		1409	too many places with same name
RMNH.INS.24333	E.J. van Nieukerken	PreservedSpecimen	BOLD:AAD0468	Ectoedemia insularis		1	1 male	adult	adult	Korea, South	Gangwon			Mt. Gariwang, Najeon-ri, Bukpyeong-myun, Jeongseon	B.W. Lee, J.O. Lim	2011-06-29														Korean National Herbarium, Gwangneung						EvN4333		Male genitalia	euparal	E.J. van Nieukerken		1602	37.27'09.5"N-128.35'47.7"E	Degrees Minutes Seconds			37.4526	128.597
	E.J. van Nieukerken	PreservedSpecimen		Ectoedemia insularis		3	2 males, 1 female	adult	larva	Korea	Jeollabuk-do			Muju-gun, Deogyu-san NP, near lake	E.J. van Nieukerken & S. Richter	2013-10-30			2014-04-17	2014-04-20	EvN2013168	EvN no 2013168-1K					leafmines	roadside along reservoir	reared from larvae	RMNH, Naturalis Biodoversity Center		Salix raddeana	Salix raddeana		E.J. van Nieukerken							1504			GPS Dakota	WGS84	35.9511	127.692	856
RMNH.INS.23890	E.J. van Nieukerken	PreservedSpecimen	BOLD:AAD0468	Ectoedemia insularis		1	1 female	adult	adult	Japan	Hokkaido			Hokkaido, Kitami-shi, Toyochi-oohashi	Susumi Kawahara	2004-06-08														RMNH, Naturalis Biodoversity Center						EvN3890		Female genitalia	euparal	E.J. van Nieukerken	2009-01-21	1602
RMNH.INS.24332	E.J. van Nieukerken	PreservedSpecimen	BOLD:AAD0468	Ectoedemia insularis		1	1 female	adult	adult	Korea, South	Gangwon			Mt. Gariwang, Najeon-ri, Bukpyeong-myun, Jeongseon	B.W. Lee, J.O. Lim	2011-06-29														Korean National Herbarium, Gwangneung						EvN4332		Female genitalia	euparal	E.J. van Nieukerken		1602	37.27'09.5"N-128.35'47.7"E	Degrees Minutes Seconds			37.4526	128.597
	E.J. van Nieukerken	PreservedSpecimen		Ectoedemia insularis		2	2 females	adult	larva	Japan	Honshu	Nagano ken	Yamagata-mura	Karasawa	Nagao Hirano	2013-11-04			2014-05-24		Hirano-Host-2964								reared from larvae	RMNH, Naturalis Biodoversity Center		Salix caprea	Salix caprea									1602			GPS EvN		36.158	137.846
RMNH.INS.30117	E.J. van Nieukerken	PreservedSpecimen	BOLD:AAD0468	Ectoedemia insularis		1		larva	larva	Korea	Gyeongsangbuk-do			Mt Ddaed Recreational Park	E.J. van Nieukerken & S. Richter	2013-10-28					EvN2013143	EvN no 2013143-M		fresh dead larva			leafmines	mixed Pinus-hardwood forest		RMNH, Naturalis Biodoversity Center	larval slide + DNA extract	Salix raddeana	Salix raddeana		E.J. van Nieukerken	RMNH.INS.30117		larval skin	Euparal	Camiel Doorenweerd		1602			GPS Dakota	WGS84	36.6632	127.964	400
RMNH.INS.30187	E.J. van Nieukerken	PreservedSpecimen	BOLD:AAD0468	Ectoedemia insularis		1		larva	larva	Korea	Gyeongsangbuk-do			Mt Ddaed Recreational Park	E.J. van Nieukerken & S. Richter	2013-10-28					EvN2013143	EvN no 2013143-M		dead larva			leafmines	mixed Pinus-hardwood forest		RMNH, Naturalis Biodoversity Center	larval slide + DNA extract	Salix raddeana	Salix raddeana		E.J. van Nieukerken	RMNH.INS.30187		larval skin	Euparal	Camiel Doorenweerd		1602			GPS Dakota	WGS84	36.6632	127.964	400
RMNH.INS.30141	E.J. van Nieukerken	PreservedSpecimen		Ectoedemia insularis		1		larva	larva	Korea	Jeollabuk-do			Muju-gun, Deogyu-san NP, near lake	E.J. van Nieukerken & S. Richter	2013-10-30					EvN2013168	EvN no 2013168-1M		dead larva			leafmines	roadside along reservoir		RMNH, Naturalis Biodoversity Center	Tissue collection -80	Salix raddeana	Salix raddeana		E.J. van Nieukerken							1602			GPS Dakota	WGS84	35.9511	127.692	856
RMNH.INS.30194	E.J. van Nieukerken	PreservedSpecimen		Ectoedemia insularis		1		larva	larva	Korea	Jeollabuk-do			Muju-gun, Deogyu-san NP, near lake	E.J. van Nieukerken & S. Richter	2013-10-30					EvN2013168	EvN no 2013168-1M		dead parasitised larva			leafmines	roadside along reservoir		RMNH, Naturalis Biodoversity Center	Tissue collection -80	Salix raddeana	Salix raddeana		E.J. van Nieukerken							1602			GPS Dakota	WGS84	35.9511	127.692	856
RMNH.INS.30195	E.J. van Nieukerken	PreservedSpecimen		Ectoedemia insularis		1		larva	larva	Korea	Jeollabuk-do			Muju-gun, Deogyu-san NP, near lake	E.J. van Nieukerken & S. Richter	2013-10-30					EvN2013168	EvN no 2013168-1M		dead parasitised larva			leafmines	roadside along reservoir		RMNH, Naturalis Biodoversity Center	Tissue collection -80	Salix raddeana	Salix raddeana		E.J. van Nieukerken							1602			GPS Dakota	WGS84	35.9511	127.692	856
	E.J. van Nieukerken	PreservedSpecimen		Ectoedemia insularis		1 mine		leafmines		Korea	Gyeongsangbuk-do			Mt Ddaed Recreational Park	E.J. van Nieukerken & S. Richter	2013-10-28					EvN2013143	EvN no 2013143-M	RMNH.INS.30117				leafmines	mixed Pinus-hardwood forest		RMNH, Naturalis Biodoversity Center	larva in tissue collection	Salix raddeana	Salix raddeana		E.J. van Nieukerken							1602			GPS Dakota	WGS84	36.6632	127.964	400
	E.J. van Nieukerken	PreservedSpecimen		Ectoedemia insularis		4 mines		leafmines		Korea	Gyeongsangbuk-do			Mt Ddaed Recreational Park	E.J. van Nieukerken & S. Richter	2013-10-28					EvN2013143	EvN no 2013143-K/M	RMNH.INS.30187				leafmines	mixed Pinus-hardwood forest		RMNH, Naturalis Biodoversity Center	larvae reared, one dead in tissue collection	Salix raddeana	Salix raddeana		E.J. van Nieukerken							1602			GPS Dakota	WGS84	36.6632	127.964	400
	E.J. van Nieukerken	PreservedSpecimen		Ectoedemia insularis		3 mines		leafmines		Korea	Jeollabuk-do			Muju-gun, Deogyu-san NP, near lake	E.J. van Nieukerken & S. Richter	2013-10-30					EvN2013168	EvN no 2013168-1M	RMNH.INS.30141, 30194-30195				leafmines	roadside along reservoir		RMNH, Naturalis Biodoversity Center	3 larvae in tissue collection	Salix raddeana	Salix raddeana		E.J. van Nieukerken							1602			GPS Dakota	WGS84	35.9511	127.692	856
	E.J. van Nieukerken	PreservedSpecimen		Ectoedemia insularis		many mine		leafmines		Korea	Jeollabuk-do			Muju-gun, Deogyu-san NP, near lake	E.J. van Nieukerken & S. Richter	2013-10-30					EvN2013168	EvN no 2013168-1K					leafmines	roadside along reservoir		RMNH, Naturalis Biodoversity Center	larvae reared	Salix raddeana	Salix raddeana		E.J. van Nieukerken							1602			GPS Dakota	WGS84	35.9511	127.692	856
RMNH.INS.24799	E.J. van Nieukerken	PreservedSpecimen		Fomoria scobleella		1	1 male	adult	adult	Madagascar			Forêt de Befasy	40 km S. de Morondava	R. Paulian	1956-01-01	1956-01-10								Holotype	Ectoedemia scobleella Minet				MNHN, Muséum National d'Histoire Narurelle, Paris						EvN4799		Male genitalia	euparal	E.J. van Nieukerken	2016-02-12	1602
	E.J. van Nieukerken	PreservedSpecimen		Fomoria scobleella		1	1 male	adult	adult	Madagascar			Forêt de Befasy	40 km S. de Morondava	R. Paulian	1956-01-01	1956-01-10									Ectoedemia scobleella Minet				MNHN, Muséum National d'Histoire Narurelle, Paris						JMinet1001		Wings	euparal	J. Minet		1602
	E.J. van Nieukerken	PreservedSpecimen		Fomoria scobleella		1	1 male	adult	adult	Madagascar			Forêt de Befasy	40 km S. de Morondava	R. Paulian	1956-01-01	1956-01-10								Paratype	Ectoedemia scobleella Minet				MNHN, Muséum National d'Histoire Narurelle, Paris						JMinet1002		Male genitalia	euparal	J. Minet		1602
	E.J. van Nieukerken	PreservedSpecimen		Fomoria scobleella		1	1 male	adult	adult	Madagascar			Forêt de Befasy	40 km S. de Morondava	R. Paulian	1956-01-01	1956-01-10								Paratype	Ectoedemia scobleella Minet				MNHN, Muséum National d'Histoire Narurelle, Paris						JMinet1003		Wings	euparal	J. Minet		1602
	E.J. van Nieukerken	PreservedSpecimen		Fomoria scobleella		1	1 male	adult	adult	Madagascar			Forêt de Befasy	40 km S. de Morondava	R. Paulian	1956-01-01	1956-01-10								Paratype	Ectoedemia scobleella Minet				MNHN, Muséum National d'Histoire Narurelle, Paris												1602
	E.J. van Nieukerken	PreservedSpecimen		Fomoria sporadopa		1	1 male	adult	adult	Sri Lanka	Eastern Province			Trincomalee	T. Bainbrigge Fletcher	1907-06-08									Holotype	Nepticula sporadopa Meyrick				BMNH, Natural History Museum London						BM24103		Male genitalia	euparal	EJvN
RMNH.INS.24502	E.J. van Nieukerken	PreservedSpecimen		Glaucolepis argentosa		1	1 male	adult	adult	Belize	Cayo Distr.			Chiquibui For. Res., Las Cuevas	R. Puplesis & S. Hill	1998-04-03	1998-04-16								Paratype	Glaucolepis argentosa Puplesis & Robinson				RMNH, Naturalis Biodoversity Center	donation from BM					EvN4502		Male genitalia, wings	euparal	E.J. van Nieukerken	2014-02-05	1401			google earth		16.732	-88.988
RMNH.INS.23748	E.J. van Nieukerken	PreservedSpecimen		Glaucolepis argentosa		1	1 male	adult	adult	Belize	Cayo Distr.			Chiquibui For. Res., Las Cuevas	R. Puplesis & S. Hill	1998-04-03	1998-04-16								Paratype	Glaucolepis argentosa Puplesis & Robinson				BMNH, Natural History Museum London						EvN3748		Male genitalia	euparal	E.J. van Nieukerken	2007-01-30	0609			google earth		16.732	-88.988
	E.J. van Nieukerken	PreservedSpecimen		Glaucolepis argentosa		1	1 male	adult	adult	Belize	Cayo Distr.			Chiquibui For. Res., Las Cuevas	R. Puplesis & S. Hill	1998-04-03	1998-04-16													BMNH, Natural History Museum London						BM29108		Male genitalia	euparal	Diskus		0609			google earth		16.732	-88.988
RMNH.INS.22996	E.J. van Nieukerken	PreservedSpecimen		Glaucolepis hamirella		2	1 male, 1 female	adult	adult	Turkey	Antalya			Antalya 20 km W	K. Nupponen & J. Junnilainen	1996-05-05														RMNH, Naturalis Biodoversity Center	RMNH.ENTO.938					EvN2996		Male genitalia		E.J. van Nieukerken		0012	36.53-30.29	Degrees Minutes	est times	ED50	36.88	30.48
	E.J. van Nieukerken	PreservedSpecimen		Glaucolepis hamirella		2	1 male, 1 female	adult	adult	Turkey	Antalya			Antalya 20 km W	K. Nupponen & J. Junnilainen	1996-05-05														Junnilainen, J., personal collection						EvN2994		Male genitalia		E.J. van Nieukerken		0012	36.53-30.29	Degrees Minutes	est times	ED50	36.88	30.48
	R. Johansson	PreservedSpecimen		Glaucolepis hamirella		4	1 male, 3 adults	adult	adult	Cyprus				Alethrikó	R. Johansson	1991-06-14														RMNH(M), Johansson, R., personal collection	RMNH ENTO.929											0206
RMNH.INS.11642	E.J. van Nieukerken	PreservedSpecimen	BOLD:ACU5753	Glaucolepis hamirella		1	1 male	adult	adult	Turkey	Antalya			Antalya, 20 km W	J. Junnilainen	2000-05-15														RMNH, Naturalis Biodoversity Center	DNA extract from hindlegs											0206	36.53-30.29	Degrees Minutes	est times	ED50	36.88	30.48
	E.J. van Nieukerken	PreservedSpecimen		Glaucolepis hamirella		1	1 male	adult	adult	Algeria				Biskra	P. Chrétien	1909-05-01	1909-05-30								Lectotype	Nepticula hamirella Chrétien				MNHN, Muséum National d'Histoire Narurelle, Paris						KL0718		Male genitalia		J. Klimesch			34.51-5.44	degrees minutes	geonames	WGS84	34.85	5.73
IB1899	E.J. van Nieukerken	PreservedSpecimen		Glaucolepis hamirella		1	1 male	adult	adult	Cyprus	Paphos			Oreites Forest	I. Barton	2014-05-15		15.v.2014					IB1899				light			Barton, I., personal collection												1602					34.7307	32.6367	340
RMNH.INS.24557	E.J. van Nieukerken	PreservedSpecimen	BOLD:ACU5753	Glaucolepis hamirella		1	1 male	adult	adult	Cyprus				Hisarköy	B. Skule	2007-05-12	2007-05-18													ZMUC, Zoological Museum, Natural History Museum of Denmark, Copenhagen						EvN4557		Male genitalia	euparal	E.J. van Nieukerken	2014-03-06	1304	35.18N-33.06E	Degrees Minutes			35.3	33.1	250
RMNH.INS.23763	E.J. van Nieukerken	PreservedSpecimen	BOLD:ACY3686	Glaucolepis hamirella		1	1 male	adult	adult	Morocco	ED			Tinin, Passhöhe	A. Werno	2005-05-16												Lichtfang, Strassenrand	at light	Werno, A. , personal collection						EvN3763		Male genitalia	euparal	EJvN/CvdB	2007-01-31	0610	29.43.35-09.16.33W	Degrees Minutes Seconds	label		29.7167	-9.2758
	E.J. van Nieukerken	PreservedSpecimen		Glaucolepis hamirella		1	1 male	adult	adult	Morocco				Tinerhir area	O. Karsholt	1989-04-12														ZMUC, Zoological Museum, Natural History Museum of Denmark, Copenhagen						EvN3186		Male genitalia		E.J. van Nieukerken		9003							1400
RMNH.INS.24821	E.J. van Nieukerken	PreservedSpecimen	BOLD:ADA1668	Glaucolepis hamirella		1	1 male	adult	adult	Spain: Canary Islands	Fuerteventura			La Lajita	A. Stübner	2013-04-09								Lf			at light		at light	Stübner, A., personal collection						EvN4821		Male genitalia	euparal	E.J. van Nieukerken	2016-02-18	1510
	E.J. van Nieukerken	PreservedSpecimen		Glaucolepis hamirella		1	1 male	adult	adult	Spain: Canary Islands	Gran Canaria			Maspalomas	P. Grotenfelt	1992-03-24														MZH, Finnish Museum of Natural History, Helsinki												0709	28RDR46	MGRS			27.66	-15.61
	E.J. van Nieukerken	PreservedSpecimen		Glaucolepis hamirella		1	1 male	adult	adult	Spain: Canary Islands	Gran Canaria			Maspalomas	P. Grotenfelt	1994-04-03														MZH, Finnish Museum of Natural History, Helsinki						JCK15045		Male genitalia	euparal	JC Koster	2007-09-25	0709	28RDR46	MGRS			27.66	-15.61
	E.J. van Nieukerken	PreservedSpecimen		Glaucolepis hamirella		1	1 male	adult	adult	Turkey	Antalya			Antalya, 20 km W	J. Junnilainen	2000-05-15							RMNH.INS.11642							Junnilainen, J., personal collection												0206	36.53-30.29	Degrees Minutes	est times	ED50	36.88	30.48
	R. Johansson	PreservedSpecimen		Glaucolepis hamirella		1	1 female	adult	adult	Cyprus				Limassol	R. Johansson	1984-05-26														Johansson, R., personal collection												0206	36SWD0134	MGRS			34.648	33.011
	E.J. van Nieukerken	PreservedSpecimen		Glaucolepis magna		1	1 male	adult	adult	France	Var		Tourves	D64, Rte de Mazaugues, Malausse	Jacques Nel	2011-04-25									Holotype	Trifurcula collinella Nel				Nel, J., personal collection						JN25662		Male genitalia		J. Nel		1602			google earth	WGS84	43.3826	5.8956	405
	E.J. van Nieukerken	PreservedSpecimen		Glaucolepis oishiella		1	1 female	adult	larva	Japan	Honshu			?	T. Oishi										Holotype	Trifurcula oishiella Matsumura		from Gall in branches	reared from larvae	Laboratory of Systematic Entomology, Hokkaido Univversity		Prunus				EvN2916		Female genitalia		E.J. van Nieukerken		9705
	E.J. van Nieukerken	PreservedSpecimen		Glaucolepis saturejae		2	1 male, 1 female	adult	adult	Italy	Piemonte	Asti		fraz. Mombarone, Casc. Bet [Cascine Bet]	O. Maioglio	2015-07-23											trap		at light	Baldizzone, G., personal collection													44°58'59"N 8°09'05"E	DMS	G. Baldizzone	WGS84	44.9831	8.15139	245
	E.J. van Nieukerken	PreservedSpecimen		Glaucolepis saturejae		2	1 male, 1 female	adult	adult	Spain	Málaga			Camino de Benahavis	E. Traugott-Olsen	1983-06-08														ZMUC, RMNH (F)
	E.J. van Nieukerken	PreservedSpecimen		Glaucolepis saturejae		1	1 male	adult	adult	Croatia	Krk			Krk, dint. di Poljica	G. Baldizzone	2012-07-10													at light	Baldizzone, G., personal collection												1212			google earth	WGS84	45.084	14.493
	E.J. van Nieukerken	PreservedSpecimen		Glaucolepis saturejae		1	1 male	adult	adult	France	Aude			Sigéan	A. & Z. Lastuvka	1991-06-23													at light	Lastuvka, A., personal collection												9210	47.80-0.71 P	Paris decimal degrees	map 1:100000evn		43.02	2.975
	E.J. van Nieukerken	PreservedSpecimen		Glaucolepis saturejae		1	1 male	adult	adult	France	Hautes-Alpes			St. Crépin, Durance valley	H.G. Amsel	1959-06-24	1959-06-30													SMNK, Staatliches Museum für Naturkunde Karlsruhe													49.6721-4.7423P	Paris Decimal degrees	map 1:25.000evn		44.705	6.602	900
	E.J. van Nieukerken	PreservedSpecimen		Glaucolepis saturejae		1	1 male	adult	adult	France	Hérault			Montagne d'Artenac	P. Chrétien	1904-07-12														MNHN, Muséum National d'Histoire Narurelle, Paris													31TDJ8111	MGRS	google earth/personal visit		43.482	2.759
	E.J. van Nieukerken	PreservedSpecimen		Glaucolepis saturejae		1	1 male	adult	adult	France	Hérault			St. Pons/ Nesp.	P. Chrétien	1904-08-01	1904-08-03													MNHN, Muséum National d'Histoire Narurelle, Paris													31TDJ81	MGRS			43.44	2.75
RMNH.INS.21817	E.J. van Nieukerken	PreservedSpecimen		Glaucolepis saturejae		1	1 male	adult	adult	France	Vaucluse			Viens	R. Buvat	1971-08-28							Buvat no 23702							RMNH, Naturalis Biodoversity Center						VU1817		Male genitalia					31TGJ0664	MGRS			43.9	5.565
	E.J. van Nieukerken	PreservedSpecimen		Glaucolepis saturejae		1	1 male	adult	adult	France	Vaucluse			Viens	R. Buvat	1971-08-23							Buvat no 23677							Mus Hist Nat Marseille, coll Buvat													31TGJ0664	MGRS			43.9	5.565
	E.J. van Nieukerken	PreservedSpecimen		Glaucolepis saturejae		1	1 male	adult	adult	France	Vaucluse			Viens	R. Buvat	1972-08-27							Buvat no 24453							Mus Hist Nat Marseille, coll Buvat												9102	31TGJ0664	MGRS			43.9	5.565
	E.J. van Nieukerken	PreservedSpecimen		Glaucolepis saturejae		1	1 male	adult	adult	France	Vaucluse			Viens	R. Buvat	1973-08-21							Buvat no 25132							Mus Hist Nat Marseille, coll Buvat												9102	31TGJ0664	MGRS			43.9	5.565
	E.J. van Nieukerken	PreservedSpecimen		Glaucolepis saturejae		1	1 male	adult	adult	France	Vaucluse			Viens	R. Buvat	1973-08-22							Buvat no 25139							RMNH, Naturalis Biodoversity Center													31TGJ0664	MGRS			43.9	5.565
	E.J. van Nieukerken	PreservedSpecimen		Glaucolepis saturejae		1	1 male	adult	adult	France	Vaucluse			Viens	R. Buvat	1974-08-14							Buvat no 25880							Mus Hist Nat Marseille, coll Buvat													31TGJ0664	MGRS			43.9	5.565
	E.J. van Nieukerken	PreservedSpecimen		Glaucolepis saturejae		1	1 male	adult	adult	France	Vaucluse			Viens	R. Buvat	1975-08-15							Buvat no 26140							RMNH, Naturalis Biodoversity Center													31TGJ0664	MGRS			43.9	5.565
	E.J. van Nieukerken	PreservedSpecimen		Glaucolepis saturejae		1	1 male	adult	adult	France	Vaucluse			Viens	R. Buvat	1976-08-24							Buvat no 26701							Mus Hist Nat Marseille, coll Buvat													31TGJ0664	MGRS			43.9	5.565
	E.J. van Nieukerken	PreservedSpecimen		Glaucolepis saturejae		1	1 male	adult	adult	France	Vaucluse			Viens	R. Buvat	1977-07-19							Buvat no 27061							Mus Hist Nat Marseille, coll Buvat													31TGJ0664	MGRS			43.9	5.565
	E.J. van Nieukerken	PreservedSpecimen		Glaucolepis saturejae		1	1 male	adult	adult	France	Vaucluse			Viens	R. Buvat	1983-08-04							Buvat no 30051					um		Mus Hist Nat Marseille, coll Buvat												9102	31TGJ0664	MGRS			43.9	5.565
	E.J. van Nieukerken	PreservedSpecimen		Glaucolepis saturejae		1	1 male	adult	adult	France	Vaucluse			Viens	R. Buvat	1985-08-12							Buvat no 30676							Mus Hist Nat Marseille, coll Buvat													31TGJ0664	MGRS			43.9	5.565
	E.J. van Nieukerken	PreservedSpecimen		Glaucolepis saturejae		1	1 male	adult	adult	France	Vaucluse			Viens	R. Buvat	1987-08-08							Buvat no 31090							RMNH, Naturalis Biodoversity Center													31TGJ0664	MGRS			43.9	5.565
	E.J. van Nieukerken	PreservedSpecimen		Glaucolepis saturejae		1	1 male	adult	adult	Greece	Dodekanísos			Kos, 5 km E Kos	R. Johansson	1988-10-01														RMNH, Naturalis Biodoversity Center	(gift)											9409	36.53-27.19	Degrees Minutes	geonames	WGS84	36.88	27.32
	E.J. van Nieukerken	PreservedSpecimen		Glaucolepis saturejae		1	1 male	adult	adult	Greece	Dodekanísos			Kos, Asfendiou	R. Johansson	1988-10-12														RMNH, Naturalis Biodoversity Center	(gift)											9409	36.5103-27.1232	Degrees Minutes Seconds	geonames		36.8508	27.2089
	A. Lastuvka	PreservedSpecimen		Glaucolepis saturejae		1	1 male	adult	adult	Greece	Dodekanísos			Kos, Kaka Pinari, Agia Mar	P. Grotenfelt	1979-05-31														MZH, Finnish Museum of Natural History, Helsinki						vial on pin		Male genitalia	glycerin	A. Lastuvka		0708	35SNA28	MGRS			36.87	27.22
	A. Lastuvka	PreservedSpecimen		Glaucolepis saturejae		1	1 male	adult	adult	Greece	Dodekanísos			Kos, Lambi	P. Grotenfelt	1979-06-01														MZH, Finnish Museum of Natural History, Helsinki						vial on pin		Male genitalia	glycerin	A. Lastuvka		0708	35SNA28	MGRS			36.87	27.22
	R. Johansson	PreservedSpecimen		Glaucolepis saturejae		1	1 male	adult	adult	Greece	Dodekanísos			Rodos, 5 km S. Rhodos C.	R. Johansson	1991-08-26	1991-08-30													Johansson, R., personal collection												0206	36.24-28.13	Degrees Minutes	est from geonam	WGS84	36.4	28.22
RMNH.INS.22906	E.J. van Nieukerken	PreservedSpecimen		Glaucolepis saturejae		1	1 male	adult	adult	Greece	Lakonia			10 km S Gytheio	O. Karsholt	1994-05-30														RMNH, Naturalis Biodoversity Center						EvN2906		Male genitalia		E.J. van Nieukerken		9609	37.40-22.30	Degrees Minutes	times atlas		37.07	22.05	100
	E.J. van Nieukerken	PreservedSpecimen		Glaucolepis saturejae		1	1 male	adult	adult	Greece	Lakonia			5 km S Monemvasia	B. Skule & S. Langemark	1982-07-01	1982-07-08													ZMUC, Zoological Museum, Natural History Museum of Denmark, Copenhagen						EvN2907		Male genitalia		E.J. van Nieukerken			34SFF8156	MGRS			36.632	23.024
	E.J. van Nieukerken	PreservedSpecimen		Glaucolepis saturejae		1	1 male	adult	adult	Greece	Messinía			Kardamili	O. Karsholt	1994-06-02	1994-06-03												at light	ZMUC, Zoological Museum, Natural History Museum of Denmark, Copenhagen												9609	34SFF18	MGRS			36.86	22.23	s.l.
	E.J. van Nieukerken	PreservedSpecimen		Glaucolepis saturejae		1	1 male	adult	adult	Italy	Asti			fraz. Valmanera, Oasi WVF	G. Baldizzone	2009-07-22													at light	Baldizzone, G., personal collection												1002			google earth		44.937	8.192	200
RMNH.INS.23749	E.J. van Nieukerken	PreservedSpecimen		Glaucolepis saturejae		1	1 male	adult	adult	Italy	Asti			fraz. Valmanera, Oasi WWF	G. Baldizzone	2006-07-13													at light	Baldizzone, G., personal collection						EvN3749		Male genitalia	euparal	EJvN/CvdB	2007-01-30	0701			google earth		44.937	8.192	130
	E.J. van Nieukerken	PreservedSpecimen		Glaucolepis saturejae		1	1 male	adult	adult	Italy	Asti			fraz. Valmanera, oasi WWF	G. Baldizzone	2010-07-23												lux	at light	Baldizzone, G., personal collection												1011			google earth		44.937	8.192	200
	E.J. van Nieukerken	PreservedSpecimen		Glaucolepis saturejae		1	1 male	adult	adult	Italy	Asti			fraz. Valmanera, Oasi WWF	G. Baldizzone	2013-08-01												trap	at light	Baldizzone, G., personal collection												1406			google earth		44.937	8.192	200
	R. Johansson	PreservedSpecimen		Glaucolepis saturejae		1	1 male	adult	adult	Italy	Latina			Monti Aurunci, 4 km NW Castelforte	R. Johansson	1972-08-07														Johansson, R., personal collection						RJ1225		Male genitalia		R. Johansson		0206	33TVF07	MGRS			41.28	13.81
	R. Johansson	PreservedSpecimen		Glaucolepis saturejae		1	1 male	adult	adult	Italy	Latina			Monti Aurunci, 5 km N Itri	R. Johansson	1972-08-04	1972-08-11													Johansson, R., personal collection						RJ1226		Male genitalia		R. Johansson		0206	33TUF77	MGRS			41.27	13.45
RMNH.INS.15340	E.J. van Nieukerken	PreservedSpecimen		Glaucolepis saturejae		1	1 male	adult	adult	Italy	Piemonte	Asti		fraz. Mombarone, Casc. Bet [Cascine Bet]	O. Maioglio	2014-08-11											trap		at light	RMNH, Naturalis Biodoversity Center													44°58'59"N 8°09'05"E	DMS	G. Baldizzone	WGS84	44.9831	8.15139	245
RMNH.INS.15341	E.J. van Nieukerken	PreservedSpecimen		Glaucolepis saturejae		1	1 male	adult	adult	Italy	Piemonte	Asti		fraz. Mombarone, Casc. Bet [Cascine Bet]	O. Maioglio	2014-08-11											trap		at light	RMNH, Naturalis Biodoversity Center													44°58'59"N 8°09'05"E	DMS	G. Baldizzone	WGS84	44.9831	8.15139	245
	E.J. van Nieukerken	PreservedSpecimen		Glaucolepis saturejae		1	1 male	adult	adult	Italy	Piemonte			Susa	J. Klimesch	1965-09-03			1966-06-08		Klimesch Zucht No. 883							leafmines	reared from larvae	ZSM, Zoologisches Staatssammlung München		Clinopodium nepeta				KL1318		Male genitalia		J. Klimesch
	E.J. van Nieukerken	PreservedSpecimen		Glaucolepis saturejae		1	1 male	adult	adult	Italy	Piemonte			Susa	J. Klimesch	1974-08-25			1975-03-25		Klimesch Zucht No. 1113							leafmines	reared from larvae	ZSM, Zoologisches Staatssammlung München		Clinopodium nepeta
	A. Lastuvka	PreservedSpecimen		Glaucolepis saturejae		1	1 male	adult	adult	Spain	Albacete			El Pardal	A. & Z. Lastuvka	2004-06-29								Data received from A&Z Lastuvka 2004						Lastuvka, A., personal collection
	E.J. van Nieukerken	PreservedSpecimen		Glaucolepis saturejae		1	1 male	adult	adult	Spain	Barcelona			Anoia: La Pobla de Claramunt	E. Requeña Miret	1988-08-20														RMNH, Naturalis Biodoversity Center	RMNH.ENTO.855					ER135		Male genitalia		E. Requeña Miret		0107	41.33-1.41	degrees minutes	geonames	WGS84	41.55	1.68
	E.J. van Nieukerken	PreservedSpecimen		Glaucolepis saturejae		1	1 male	adult	adult	Spain	Girona			Anglés	A. & Z. Lastuvka	1991-06-24													at light	Lastuvka, A., personal collection						AL38		Male genitalia	euparal	A. Lastuvka		9209	41.57-2.39	degrees minutes	geonames	WGS84	41.95	2.65
	E.J. van Nieukerken	PreservedSpecimen		Glaucolepis saturejae		1	1 male	adult	adult	Spain	Málaga			Camino de Cesares	E. Traugott-Olsen	1973-07-09														RMNH, Naturalis Biodoversity Center						KL0780		Male genitalia		J. Klimesch			30STF9736	MGRS	map 1:50.000		36.448	-5.265
	E.J. van Nieukerken	PreservedSpecimen		Glaucolepis saturejae		1	1 male	adult	adult	Spain	Málaga			Camino de Cesares	E. Traugott-Olsen	1973-07-09														RMNH, Naturalis Biodoversity Center						KL0782		Male genitalia	Eukitt	J. Klimesch	1975-04-20		30STF9736	MGRS	map 1:50.000		36.448	-5.265
RMNH.INS.22805	E.J. van Nieukerken	PreservedSpecimen		Glaucolepis saturejae		1	1 male	adult	adult	Spain	Málaga			Marbella, 2 km N: road to Ojen	E.J. van Nieukerken	1984-02-05			1984-03-26		EvN1984002	VU no. 84002					leafmines		reared from larvae	RMNH, Naturalis Biodoversity Center		Clinopodium nepeta	Clinopodium nepeta		E.J. van Nieukerken	EvN2805		Male genitalia		E.J. van Nieukerken							36.5266	-4.87648	150
	E.J. van Nieukerken	PreservedSpecimen		Glaucolepis saturejae		2	2 males	adult	adult	Greece	Dodekanísos			Kos, Asfendiou	R. Johansson	1988-10-06														Johansson, R., personal collection						RJ1745		Male genitalia		R. Johansson		9012	36.5103-27.1232	Degrees Minutes Seconds	geonames		36.8508	27.2089
	E.J. van Nieukerken	PreservedSpecimen		Glaucolepis saturejae		2	2 males	adult	adult	Greece	Thesprotia			10 km S Igoumenitsa	M. Fibiger	1990-07-25	1990-07-26												at light	ZMUC,RMNH												9205	39.28-20.15	Degrees Minutes	times atlas		39.47	20.25
	E.J. van Nieukerken	PreservedSpecimen		Glaucolepis saturejae		2	2 males	adult	adult	Italy	Piemonte	Asti		fraz. Mombarone, Casc. Bet [Cascine Bet]	O. Maioglio	2014-08-11											trap		at light	Baldizzone, G., personal collection													44°58'59"N 8°09'05"E	DMS	G. Baldizzone	WGS84	44.9831	8.15139	245
	E.J. van Nieukerken	PreservedSpecimen		Glaucolepis saturejae		3	3 males	adult	adult	Greece	Dodekanísos			Kos, 5 km E Kos	R. Johansson	1988-10-01														Johansson, R., personal collection												9012	36.53-27.19	Degrees Minutes	geonames	WGS84	36.88	27.32
	E.J. van Nieukerken	PreservedSpecimen		Glaucolepis saturejae		4	4 males	adult	adult	Croatia	Krk			Krk, Jezero	G. Baldizzone	2008-08-22												lux	at light	RMNH (1); Baldizzone, G., personal collection												0812	45.10'25,7" N - 14.34'05,3" E	Degrees Minutes Seconds	GPS		45.1738	14.5681	1
	E.J. van Nieukerken	PreservedSpecimen		Glaucolepis saturejae		1	1 female	adult	adult	Croatia	Krk			Krk, Misucaynica	G. Baldizzone	1986-08-09														Baldizzone, G., personal collection						EvN2599		Female genitalia	euparal	E.J. van Nieukerken			33TVK7289	MGRS	various maps		45.054	14.644
RMNH.INS.15342	E.J. van Nieukerken	PreservedSpecimen		Glaucolepis saturejae		1	1 female	adult	adult	Italy	Piemonte	Asti		fraz. Mombarone, Casc. Bet [Cascine Bet]	O. Maioglio	2015-06-11											trap		at light	RMNH, Naturalis Biodoversity Center													44°58'59"N 8°09'05"E	DMS	G. Baldizzone	WGS84	44.9831	8.15139	245
RMNH.INS.24031	E.J. van Nieukerken	PreservedSpecimen	BOLD:ABW9591	Glaucolepis saturejae		1	1 female	adult		Italy: Sicily	Catania			Mt. Etna, Nicolosi, loc. Ragala	P. Triberti & G. Baldizzone	2008-06-12													at light	Triberti, P., personal collection						EvN4031		Female genitalia	euparal	EJvN & JCK	2010-03-25	1003					37.621	15.04	950
	E.J. van Nieukerken	PreservedSpecimen		Glaucolepis saturejae		1	1 female	adult	adult	Slovenia				Komen	J. Junnilainen	2007-04-22	2007-04-24													Junnilainen, J., personal collection												1602
	E.J. van Nieukerken	PreservedSpecimen		Glaucolepis saturejae		2	2 females	adult	larva	Spain	Málaga			Marbella, 2 km N: road to Ojen	E.J. van Nieukerken	1984-02-05			1984-04-23	1984-05-06	EvN1984002	VU no. 84002					leafmines		reared from larvae	RMNH, Naturalis Biodoversity Center		Clinopodium nepeta	Clinopodium nepeta		E.J. van Nieukerken												36.5266	-4.87648	150
RMNH.INS.17937	E.J. van Nieukerken	PreservedSpecimen	BOLD:ABW9591	Glaucolepis saturejae	BOLD det	1		larva	larva	Turkey	Antalya			NW of Hisarcandır, 20 km SW Antalya	E.J. van Nieukerken	2009-04-10					EvN2009009	EvN no 2009009M		larva - left mine			stemmines	Pinus brutia forest on limestone	reared from larvae	RMNH, Naturalis Biodoversity Center	DNA extract	Nepeta	Nepeta	questionable	E.J. van Nieukerken										GPS	WGS84	36.7986	30.4992	690
RMNH.INS.17938	E.J. van Nieukerken	PreservedSpecimen		Glaucolepis saturejae		1		larva	larva	Turkey	Antalya			NW of Hisarcandır, 20 km SW Antalya	E.J. van Nieukerken	2009-04-10					EvN2009009	EvN no 2009009M		? Dead larva - taken from mine			stemmines	Pinus brutia forest on limestone	reared from larvae	RMNH, Naturalis Biodoversity Center	Tissue collection -80	Nepeta	Nepeta	questionable	E.J. van Nieukerken										GPS	WGS84	36.7986	30.4992	690
RMNH.INS.11919	E.J. van Nieukerken	PreservedSpecimen	BOLD:ACE2221	Glaucolepis saturejae		1		larva	1 larva, vacated mines	Italy	Verona			Monte Baldo, Sommavilla, roadside	E.J. van Nieukerken	2005-07-23 10:40:00					EvN2005090	EvN no 2005090M		fresh larva			leafmines	olive plantations, cult area		RMNH, Naturalis Biodoversity Center	DNA extract	Clinopodium nepeta	Clinopodium nepeta		E.J. van Nieukerken							0507			GPS	WGS84	45.7284	10.7861	130
	E.J. van Nieukerken	PreservedSpecimen		Glaucolepis saturejae		+		leafmines		France	Pyrénées-Orientales			1,5 km W Le Perthus	E.J. van Nieukerken	1982-07-31					EvN1982166	VU no. 82166					leafmines		reared from larvae	RMNH, Naturalis Biodoversity Center		Clinopodium nepeta	Clinopodium nepeta		E.J. van Nieukerken								47.1788-0.5647P	Dec degrees Paris			42.4612	2.84188	360
	E.J. van Nieukerken	PreservedSpecimen		Glaucolepis saturejae		+		leafmines		France	Pyrénées-Orientales			Port-Vendres, near railway station	E.J. van Nieukerken	1982-07-28					EvN1982158	VU no. 82158					leafmines		reared from larvae	RMNH, Naturalis Biodoversity Center		Clinopodium nepeta	Clinopodium nepeta		E.J. van Nieukerken								42.31-3.06 E	DM			42.5153	3.09739	20
	E.J. van Nieukerken	PreservedSpecimen		Glaucolepis saturejae		+		leafmines		Greece	Evvoia			2 km W Prokopion	Menken & van Nieukerken	1980-09-13			1981-04-29		EvN1980562	VU no. 80562		1 adult reared, escaped			leafmines		reared from larvae	RMNH, Naturalis Biodoversity Center		Clinopodium nepeta	Clinopodium nepeta		Menken & van Nieukerken								38.44-23.28	DM			38.7418	23.4623
	E.J. van Nieukerken	PreservedSpecimen		Glaucolepis saturejae		+		leafmines		Greece	Evvoia			Dhírfis Oros, S. slopes.	Menken & van Nieukerken	1980-09-12					EvN1980544	VU no. 80544		rearing of 6 larvae failed			leafmines		reared from larvae	RMNH, Naturalis Biodoversity Center		Clinopodium nepeta	Clinopodium nepeta		Menken & van Nieukerken								38.36-23.51	DM			38.5979	23.8477	700
	E.J. van Nieukerken	PreservedSpecimen		Glaucolepis saturejae		1		leafmines		Greece	Evvoia			Kadhenoi	Menken & van Nieukerken	1980-09-13					EvN1980555	VU no. 80555					leafmines		reared from larvae	RMNH, Naturalis Biodoversity Center		Clinopodium nepeta	Clinopodium nepeta		Menken & van Nieukerken								38.34-23.47	DM			38.5632	23.789	150
	E.J. van Nieukerken	PreservedSpecimen		Glaucolepis saturejae		+		leafmines	vacated mines / dead larvae	Italy	Cuneo			Valdieri, Ris. Naturale Speciale Juniperus phoenicea	E.J. van Nieukerken	2007-08-14					EvN2007076						leafmines	open S stony slopes and forest patches on limestone		RMNH, Naturalis Biodoversity Center		Clinopodium nepeta	Clinopodium nepeta		E.J. van Nieukerken							0708			GPS	WGS84	44.2756	7.39527	860
	E.J. van Nieukerken	PreservedSpecimen		Glaucolepis saturejae		+		leafmines		Spain	Cádiz			3 km E Grazalema, road C344	E.J. van Nieukerken	1988-01-19					EvN1988077	EvN no 88077					leafmines		reared from larvae	RMNH, Naturalis Biodoversity Center		Clinopodium menthifolium	Clinopodium menthifolium		E.J. van Nieukerken												36.7617	-5.34147	780
	E.J. van Nieukerken	PreservedSpecimen		Glaucolepis saturejae		1		leafmines		Spain	Málaga			5 km S Istán, road to Embalse de la Concepción	E.J. van Nieukerken	1988-01-17					EvN1988058	EvN no 88058					leafmines		reared from larvae	RMNH, Naturalis Biodoversity Center		Clinopodium menthifolium	Clinopodium menthifolium		E.J. van Nieukerken												36.5344	-4.95485	150
RMNH.INS.24759	E.J. van Nieukerken	PreservedSpecimen		Stigmella abaiella		1	1 male	adult	adult	Iran	Teheran				Abai	1978-09-20									Holotype					SMNK, Staatliches Museum für Naturkunde Karlsruhe		Pyrus communis	Pirus communis			EvN4759		Male genitalia	Euparal	E.J. van Nieukerken	2015-10-24
	E.J. van Nieukerken	PreservedSpecimen		Stigmella abaiella		1	1 female	adult	larva	Iran	Teheran				Abai	1978-09-20								female in pupal skin						SMNK, Staatliches Museum für Naturkunde Karlsruhe	slide only	Pyrus communis	Pyrus communis			Kl866		Female genitalia	Eukitt	J. Klimesch	1979-03-07	1603
	E.J. van Nieukerken	PreservedSpecimen		Stigmella abaiella		1	1 female	adult	larva	Iran	Teheran				Abai	1978-09-20								female in pupal skin						SMNK, Staatliches Museum für Naturkunde Karlsruhe	slide only	Pyrus communis	Pyrus communis			Kl867		Female genitalia	Eukitt	J. Klimesch	1979-03-07	1603
	E.J. van Nieukerken	PreservedSpecimen		Stigmella abaiella		1	1 female	adult	larva	Iran	Teheran				Abai	1978-09-20									Paratype	Stigmella abaiella Klimesch, 1979				SMNK, Staatliches Museum für Naturkunde Karlsruhe		Pyrus communis	Pirus communis									1603
	E.J. van Nieukerken	PreservedSpecimen		Stigmella abaiella		1		larva	larva	Iran	Teheran				Abai	1978-09-20														SMNK, Staatliches Museum für Naturkunde Karlsruhe	slide only	Pyrus communis	Pyrus communis			Kl869		Larva	Eukitt	J. Klimesch	1979-03-07	1603
RMNH.INS.23679	E.J. van Nieukerken	PreservedSpecimen	BOLD:AAJ4181	Stigmella alnetella		1	1 male	adult	adult	Italy	Alessandria			Parco NR Capanne di Marcarolo, Cascina Cappellana	G. Baldizzone	2005-06-16													at light	Baldizzone, G., personal collection						EvN3679		Male genitalia		E.J. van Nieukerken		0512							450
RMNH.INS.23565	E.J. van Nieukerken	PreservedSpecimen	BOLD:AAJ4181	Stigmella alnetella		1	1 female	adult	larva	Ukraine	Luganskaya obl.			Stanichno-Luganskoe	A. Bidzilya	2002-07-04														Bidzilya, A., personal collection						EvN3565		Female genitalia		E.J. van Nieukerken		0404
RMNH.INS.17700	E.J. van Nieukerken	PreservedSpecimen	BOLD:AAJ4181	Stigmella alnetella	COI, not glutinosae	1		larva	larva	France	Alpes-Maritimes			Fontan, 1 km N, Torrent de la Céva	E.J. van Nieukerken & C. Doorenweerd	2008-10-11					EvN2008233	EvN no 2008233-1M		larva - taken from mine			leafmines	along river, Castanea forest	reared from larvae	RMNH, Naturalis Biodoversity Center	DNA extract	Alnus glutinosa	Alnus glutinosa		E.J. van Nieukerken										GPS	WGS84	44.0139	7.56187	490
RMNH.INS.11943	E.J. van Nieukerken	PreservedSpecimen	BOLD:AAJ4181	Stigmella alnetella	COI not sakhalinella but alnetella!	1		larva	larva	Italy	Roma			Manziano, Monumente Naturale della Caldera	E.J. van Nieukerken	2005-09-17 13:29:00					EvN2005115	EvN no 2005115-3M		larva in cocoon			leafmines	Birch copse near sulphur caldera	reared from larvae	RMNH, Naturalis Biodoversity Center	DNA extract	Betula pendula	Betula pendula		E.J. van Nieukerken										GPS	WGS84	42.0907	12.0973	265
RMNH.INS.12023	E.J. van Nieukerken	PreservedSpecimen	BOLD:AAJ4181	Stigmella alnetella	CO1 identification	1		larva	dead larva	Netherlands	Overijssel	Losser		Duivelshof	J.C. Koster	2005-09-24								Bladmijn in herbarium.						RMNH, Naturalis Biodoversity Center	DNA extract	Alnus glutinosa	Alnus glutinosa										32ULC6495	MGRS			52.289	7.006
RMNH.INS.24235	E.J. van Nieukerken	PreservedSpecimen		Stigmella azaroli		1	1 male	adult	adult	Greece	Dodekanísos			Rodos: Rodini	J. Klimesch	1972-09-22			1972-10-11						Holotype	Nepticula azaroli Klimesch, 1978			reared from larvae	ZSM, Zoologisches Staatssammlung München		Crataegus azarolus				EvN4235		Male genitalia		E.J. van Nieukerken		1208	36.24-28.11	Degrees Minutes	est from geonam	WGS84	36.4	28.18
RMNH.INS.24605	E.J. van Nieukerken	PreservedSpecimen	BOLD:ACU6096	Stigmella azaroli		1	1 female	adult	adult	Cyprus				Nikokleia	I. Barton	2013-10-10							Barton1411							Barton, I., personal collection						EvN4605		Female genitalia	euparal	E.J. van Nieukerken	2014-06-23	1405		Decimal Degrees	google earth	WGS84	34.73	32.576	45
RMNH.INS.29756	E.J. van Nieukerken	PreservedSpecimen	BOLD:AAP7527	Stigmella betulicola		1		larva	larva	Japan	Hokkaido			Rumoi	C. Doorenweerd & C. van den Berg	2013-09-20					CD13030	CD13030		taken from mine						RMNH, Naturalis Biodoversity Center	DNA extract (+slide)	Betula platyphylla	Betula platyphylla		C. Doorenweerd										GPS	WGS84	43.8203	141.833	70
RMNH.INS.11440	E.J. van Nieukerken	PreservedSpecimen	BOLD:AAP7527	Stigmella betulicola		1		larva	larva	Netherlands	Utrecht			Oud-Leusden, Den Treek, 2.5 km S Amersfoort	E.J. van Nieukerken	2000-09-25					EvN2000163	EvN no 2000163M					leafmines	wet heathland	reared from larvae	RMNH, Naturalis Biodoversity Center	DNA extract	Betula pubescens	Betula pubescens		E.J. van Nieukerken									Decimal degrees	GPS	WGS84	52.1214	5.39318
RMNH.INS.11438	E.J. van Nieukerken	PreservedSpecimen	BOLD:AAP7527	Stigmella betulicola		1		larva	larva	Netherlands	Utrecht			Oud-Leusden, Den Treek, 2.5 km S Amersfoort	E.J. van Nieukerken	2000-09-25					EvN2000163	EvN no 2000163M					leafmines	wet heathland	reared from larvae	RMNH, Naturalis Biodoversity Center	DNA extract	Betula pubescens	Betula pubescens		E.J. van Nieukerken									Decimal degrees	GPS	WGS84	52.1214	5.39318
RMNH.INS.11439	E.J. van Nieukerken	PreservedSpecimen	BOLD:AAP7527	Stigmella betulicola		1		larva	larva	Netherlands	Utrecht			Oud-Leusden, Den Treek, 2.5 km S Amersfoort	E.J. van Nieukerken	2000-09-25					EvN2000163	EvN no 2000163M					leafmines	wet heathland	reared from larvae	RMNH, Naturalis Biodoversity Center	DNA extract	Betula pubescens	Betula pubescens		E.J. van Nieukerken									Decimal degrees	GPS	WGS84	52.1214	5.39318
RMNH.INS.12782	E.J. van Nieukerken	PreservedSpecimen	BOLD:AAP7527	Stigmella betulicola		1		larva	larva	Sweden	Västergötland			Huneberg	E.J. van Nieukerken	2008-08-06 12:39:00					EvN2008059	EvN no 2008059-5M		larva in cocoon			leafmines	mixed forest	reared from larvae	RMNH, Naturalis Biodoversity Center	larval slide + DNA extract	Betula pubescens	Betula pubescens		E.J. van Nieukerken	RMNH.INS.12782		larval skin	Euparal	Camiel Doorenweerd					GPS	WGS84	58.3083	12.4179
CNCLEP00022722	E.J. van Nieukerken	PreservedSpecimen		Stigmella centifoliella		1	1 female	adult	larva	Canada	Ontario			Ottawa	Freeman & Lewis				1962-09-24		CNC-62-11	62-11		slide missing	Holotype	Stigmella rosaefoliella pectocatena Wilkinson & Scoble, 1979				CNC, Canadian National Collection of Insects etc., Ottawa		Rosa	Rosa sp.			CNC3292						06/2015		decimal degrees	google earth	WGS84	45.41	-75.69
RMNH.INS.23680	E.J. van Nieukerken	PreservedSpecimen	BOLD:AAJ4191	Stigmella glutinosae		4	1 male, 3 females	adult	adult	Italy	Alessandria			Parco NR Capanne di Marcarolo, Laghi di Lavagnina	G. Baldizzone	2005-06-28								+DNA					at light	RMNH (2F); Baldizzone, G., personal collection						EvN3680		Male genitalia		E.J. van Nieukerken		0512							370
RMNH.INS.24066	E.J. van Nieukerken	PreservedSpecimen	BOLD:ABX4837	Stigmella glutinosae	DNA barcode id	1	1 male	adult	adult	Russia	Ul'yanovsk			Ul'yanovsk: "Vinnovka" City Park	A. Mistchenko	2006-07-01	2006-07-31		2006-07-01	2006-07-31						Stigmella naturnella		leafmines	reared from larvae	Zolotuhin, V., personal collection		Betula pendula				EvN4066		Male genitalia	euparal	EJvN/JCK		0302	54.16-48.20	Degrees Minutes			54.27	48.03
RMNH.INS.24217	E.J. van Nieukerken	PreservedSpecimen	BOLD:ABX4837	Stigmella glutinosae	DNA extract, barcode id	1	1 female	adult	adult	Switzerland	Valais			Leuk, Susten, Illgraben	Andreas Kopp	2008-07-28										Stigmella naturnella		'NF'	at light	Kopp, A., personal collection						EvN4217		Female genitalia	euparal	E.J. van Nieukerken		1209	615.0/128.6	Swiss Grid	label				650
RMNH.INS.12871	E.J. van Nieukerken	PreservedSpecimen	BOLD:ABX4837	Stigmella glutinosae		1		larva	larva	France	Alpes-Maritimes			Saorge, vallée de Roya	E.J. van Nieukerken & C. Doorenweerd	2008-10-09					EvN2008192	EvN no 2008192M		larva - taken from mine			leafmines	river forest	reared from larvae	RMNH, Naturalis Biodoversity Center	DNA extract	Alnus glutinosa	Alnus glutinosa		E.J. van Nieukerken										GPS	WGS84	43.9856	7.54759	370
RMNH.INS.12993	E.J. van Nieukerken	PreservedSpecimen	BOLD:ABX4837	Stigmella glutinosae		1		larva	larva	France	Alpes-Maritimes			Sospel, 1.5 km E, valley Bevéra	E.J. van Nieukerken & C. Doorenweerd	2008-10-08					EvN2008144	EvN no 2008144-1M		cocoon			leafmines	forest and shrub in river valley	reared from larvae	RMNH, Naturalis Biodoversity Center	DNA extract	Alnus glutinosa	Alnus glutinosa		E.J. van Nieukerken										GPS	WGS84	43.879	7.46665	330
RMNH.INS.11343	E.J. van Nieukerken	PreservedSpecimen	BOLD:ABX4837	Stigmella glutinosae		1		larva	larva	Netherlands	Limburg			St. Pietersberg, Poppelmondedal-ENCIbos	E.J. van Nieukerken & T. Jin	1999-11-08					EvN1999306	EvN no 99306M					leafmines		reared from larvae	RMNH, Naturalis Biodoversity Center	DNA extract	Alnus glutinosa	Alnus glutinosa		E.J. van Nieukerken								175.6-314.3	Dutch Grid	map		50.8197	5.68045	110
RMNH.INS.17941	E.J. van Nieukerken	PreservedSpecimen	BOLD:ABX4837	Stigmella glutinosae	identified by DNA barcode	1		larva	parasitised larva	France	Cher			Villeneuve-sur-Cher	E.J. van Nieukerken	2009-07-30					EvN2009039	EvN no 2009039-M		parasitized larva, parasite removed		Stigmella luteella	leafmines	rivervalley, cultivated area		RMNH, Naturalis Biodoversity Center	DNA extract	Betula pendula	Betula pendula		E.J. van Nieukerken							1103			GPS	WGS84	47.0266	2.22037	117
RMNH.INS.24589	E.J. van Nieukerken	PreservedSpecimen	BOLD:AAF3364	Stigmella incognitella		1	1 female	adult	adult	Germany	Nordrhein-Westfalen			Velbert-Langenberg, oberes Deilbachtal	W. Biesenbaum	2012-05-24													at light	Biesenbaum, W., personal collection						EvN4589		Female genitalia	euparal	EvN/JC Koster	2014-05-10	1405			estimate from Google Earth		51.33	7.16
RMNH.INS.11745	E.J. van Nieukerken	PreservedSpecimen	BOLD:AAF3364	Stigmella incognitella		1		larva	larva	France	Haut-Rhin			Lapoutroie, La Bohle	E.J. van Nieukerken	2002-10-21					EvN2002216	EvN no 2002216M					leafmines in fallen leaves	in meadow	reared from larvae	RMNH, Naturalis Biodoversity Center	DNA extract	Malus pumila	Malus domestica		E.J. van Nieukerken									Decimal degrees	GPS	WGS84	48.1571	7.16358	520
RMNH.INS.17637	E.J. van Nieukerken	PreservedSpecimen	BOLD:AAF3364	Stigmella incognitella		1		larva	larva	Italy	Cuneo			Entracque, Trinità, S.	E.J. van Nieukerken & C. Doorenweerd	2008-10-13					EvN2008267	EvN no 2008267-1M		cocoon			leafmines	tree in meadow	reared from larvae	RMNH, Naturalis Biodoversity Center	DNA extract	Malus pumila	Malus domestica		E.J. van Nieukerken										GPS	WGS84	44.2097	7.4359	1070
RMNH.INS.15381	E.J. van Nieukerken	PreservedSpecimen		Stigmella longispina		1	1 male	adult	adult	Tajikistan				30 km N Dushanbe, Kondara	R. Puplesis	1989-08-20									Paratype	Stigmella longispina Puplesis, 1994				RMNH, Naturalis Biodoversity Center	Coll R. Puplesis April 1991					JCK8318		Male genitalia	euparal, remounted from glycerin	JC Koster	2015-11-20		68° 47.05' East 38° 48.86' North	DMM	http://www.birdlife.org/datazone/sitefactsheet.php?id=21866	WGS84	38.81	68.81	1200
RMNH.INS.24818	E.J. van Nieukerken	PreservedSpecimen	BOLD:ADA2884	Stigmella lurida		1	1 female	adult	adult	Russia	East Siberia	Rep. Altai		3 km SE Aktasch	B. Schacht	2012-06-15								Lf			at light		at light	Stübner, A., personal collection						EvN4818		Female genitalia	euparal	E.J. van Nieukerken	2016-02-16	1602		MGRS	google earth		50.31	87.64	1300
RMNH.INS.24030	E.J. van Nieukerken	PreservedSpecimen	BOLD:AAI0003	Stigmella luteella		2	1 male, 1 female	adult	adult	Italy: Sicily	Catania			Mt. Etna, Zafferana, loc. Cerrita	P. Triberti & G. Baldizzone	2008-06-15													at light	Triberti, P., personal collection						EvN4030		Male genitalia	euparal	E.J. van Nieukerken	2010-03-26	1003							1350
RMNH.INS.24058	E.J. van Nieukerken	PreservedSpecimen	BOLD:AAI0003	Stigmella luteella		4	1 male, 3 females	adult	adult	Italy: Sicily	Catania			M. Etna, Zafferana, loc. Cerrita	P. Triberti & G. Baldizzone	2008-06-18													at light	Triberti, P., personal collection						EvN4058		Female genitalia		E.J. van Nieukerken		1001							1350
RMNH.INS.23689	E.J. van Nieukerken	PreservedSpecimen	BOLD:AAI0003	Stigmella luteella		1	1 male	adult	adult	France: Corsica	Haute-Corse			2 km E Col de Vergio	B. Skule	2005-06-27														ZMUC, Zoological Museum, Natural History Museum of Denmark, Copenhagen						EvN3689		Male genitalia		E.J. van Nieukerken		0602	42.17.15N-8.53.37E	Degrees Minutes Seconds	label		42.2834	8.8936	1400
RMNH.INS.24286	E.J. van Nieukerken	PreservedSpecimen	BOLD:AAI0003	Stigmella luteella		3	3 males	adult	adult	Germany	Nordrhein-Westfalen			NP Eifel, Gemünd, E of Kermeter, Mittelberg	Rudi Seliger	2011-05-30														Seliger, R., personal collection						EvN4286		Male genitalia	euparal	E.J. van Nieukerken		1209							490
RMNH.INS.11754	E.J. van Nieukerken	PreservedSpecimen	BOLD:AAI0003	Stigmella luteella		1		larva	larva	France	Haut-Rhin			Munster, 4.5 km N: Mémorial du Linge	E.J. van Nieukerken	2002-10-25					EvN2002233	EvN no 2002233-3M					leafmines in fallen leaves	heathland	reared from larvae	RMNH, Naturalis Biodoversity Center	DNA extract	Betula pendula	Betula pendula		E.J. van Nieukerken										map	ED50	48.0811	7.13365	985
RMNH.INS.12986	E.J. van Nieukerken	PreservedSpecimen	BOLD:AAI0003	Stigmella luteella		1		larva	larva	Italy	Cuneo			Terme di Valieri, 1 km NE	E.J. van Nieukerken & C. Doorenweerd	2008-10-13					EvN2008289	EvN no 2008289-1M		larva - taken from mine			leafmines	roadside Betula copse	reared from larvae	RMNH, Naturalis Biodoversity Center	DNA extract	Betula pendula	Betula pendula		E.J. van Nieukerken										GPS	WGS84	44.2149	7.27893	1300
RMNH.INS.29747	E.J. van Nieukerken	PreservedSpecimen	BOLD:AAI0003	Stigmella luteella		1		larva	larva	Japan	Hokkaido			Higashikawa	C. Doorenweerd & C. van den Berg	2013-09-19					CD13025	CD13025		taken from mine						RMNH, Naturalis Biodoversity Center	DNA extract (+slide)	Betula platyphylla	Betula platyphylla		C. Doorenweerd										GPS	WGS84	43.6247	142.687	450
RMNH.INS.29749	E.J. van Nieukerken	PreservedSpecimen	BOLD:AAI0003	Stigmella luteella		1		larva	larva	Japan	Hokkaido			Higashikawa	C. Doorenweerd & C. van den Berg	2013-09-19					CD13025	CD13025		taken from mine						RMNH, Naturalis Biodoversity Center	DNA extract (+slide)	Betula platyphylla	Betula platyphylla		C. Doorenweerd										GPS	WGS84	43.6247	142.687	450
RMNH.INS.29959	E.J. van Nieukerken	PreservedSpecimen	BOLD:AAI0003	Stigmella luteella	leafmine morphology and hostplant	1		larva	leafmine	Norway	Nordland			10 km W Korgen	M. Kozlov	2011-08-28					N-66N-P-4-201108	N-66N-P-4-201108		dried larva						RMNH, Naturalis Biodoversity Center	DNA extract (+slide)	Betula pubescens	Betula pubescens		M. Kozlov et al	RMNH.INS.29959		larval skin	Euparal	Camiel Doorenweerd				Decimal degrees			66.049	13.609
RMNH.INS.29960	E.J. van Nieukerken	PreservedSpecimen		Stigmella luteella	leafmine morphology and hostplant	1		larva	leafmine	Norway	Sor-Trondelag			5 km S Soknesmoan	M. Kozlov	2011-08-29					N-63N-B-1-201108	N-63N-B-1-201108		dried larva						RMNH, Naturalis Biodoversity Center	DNA extract (+slide)	Betula pendula	Betula pendula		M. Kozlov et al	RMNH.INS.29960		larval skin	Euparal	Camiel Doorenweerd				Decimal degrees			62.991	10.264
RMNH.INS.29971	E.J. van Nieukerken	PreservedSpecimen	BOLD:AAI0003	Stigmella luteella	leafmine morphology and hostplant	1		larva	leafmine	Russia	Karelia			10 km N Medvezhegorsk	M. Kozlov	2009-08-01					R-63N-P-5-200908	R-63N-P-5-200908		dried larva						RMNH, Naturalis Biodoversity Center	DNA extract, leafmine voucher	Betula pubescens	Betula pubescens		M. Kozlov et al									Decimal degrees			63.002	34.382
RMNH.INS.29972	E.J. van Nieukerken	PreservedSpecimen	BOLD:AAI0003	Stigmella luteella	leafmine morphology and hostplant	1		larva	leafmine	Russia	Karelia			20 km NW Nadvoitsy	M. Kozlov	2012-08-01					R-64N-P-1-201208	R-64N-P-1-201208		dried larva						RMNH, Naturalis Biodoversity Center	DNA extract, leafmine voucher	Betula pubescens	Betula pubescens		M. Kozlov et al									Decimal degrees			64.029	34.07
RMNH.INS.29973	E.J. van Nieukerken	PreservedSpecimen	BOLD:AAI0003	Stigmella luteella	leafmine morphology and hostplant	1		larva	larva	Russia	Karelia			20 km NW Nadvoitsy	M. Kozlov	2012-08-01					R-64N-P-1-201208	R-64N-P-1-201208		dried larva						RMNH, Naturalis Biodoversity Center	larval slide + DNA extract	Betula pubescens	Betula pubescens		M. Kozlov et al	RMNH.INS.29461		larval skin	Euparal	Camiel Doorenweerd				Decimal degrees			64.029	34.07
RMNH.INS.29968	E.J. van Nieukerken	PreservedSpecimen	BOLD:AAI0003	Stigmella luteella	leafmine morphology and hostplant	1		larva	leafmine	Russia	Karelia			5 km SW Loukhi	M. Kozlov	2010-08-01					R-66N-P-5-201008	R-66N-P-5-201008		dried larva						RMNH, Naturalis Biodoversity Center	DNA extract, leafmine voucher	Betula pubescens	Betula pubescens		M. Kozlov et al									Decimal degrees			66.032	32.987
RMNH.INS.29970	E.J. van Nieukerken	PreservedSpecimen	BOLD:AAI0003	Stigmella luteella	DNA barcode, leafmine morphology, hostplant	1		larva	leafmine	Russia	Vologdskaya	Vologda obl.		Kurjanovskaya	M. Kozlov	2010-08-09					A-60.3-B-2-201008	A-60.3-B-2-201008		dried larva						RMNH, Naturalis Biodoversity Center	DNA extract (+slide)	Betula pendula	Betula pendula		M. Kozlov et al	RMNH.INS.29970		larval skin	Euparal	Camiel Doorenweerd				Decimal degrees			60.484	41.814
RMNH.INS.24430	E.J. van Nieukerken	PreservedSpecimen	BOLD:AAI0007	Stigmella microtheriella		1	1 male	adult	adult	Greece	Messinía			Taygetos Mts, 1.7 km E Saïdhona	E.J. van Nieukerken & C. Doorenweerd	2011-11-07			2012-04-04	2012-04-20	EvN2011392	EvN no 2011392-1					leafmines	mountain forest	reared from larvae	RMNH, Naturalis Biodoversity Center		Ostrya carpinifolia	Ostrya carpinifolia		E.J. van Nieukerken	EvN4430		Male genitalia	euparal			1307			GPS Dakota	WGS84	36.8847	22.3034	960
	E.J. van Nieukerken	PreservedSpecimen		Stigmella microtheriella		1	1 male	adult	adult	Japan	Kyushu	Fukuoka ken	Hikosan	Buzen	H. Kuroko				1954-07-30						Holotype	Stigmella cathepostis Kemperman & Wilkinson, 1985				UOPJ, Osaka Prefecture University, Entomology		Carpinus tschonoskii	Carpinus tschonoskii			VU0783		Male genitalia	Euparal
RMNH.INS.24629	E.J. van Nieukerken	PreservedSpecimen	BOLD:ACU7085	Stigmella microtheriella		1	1 male	adult	adult	Korea	Jeollanam-do			Wando Island, Hwaheung-ri	E.J. van Nieukerken & S. Richter	2013-11-01			2014-04-02		EvN2013181	EvN no 2013181-1K					leafmines	mixed Pinus - evergreen-deciduous forest	reared from larvae	RMNH, Naturalis Biodoversity Center		Carpinus tschonoskii	Carpinus tschonoskii		E.J. van Nieukerken	EvN4629			euparal	E.J. van Nieukerken	2015-06-30	1504			GPS Dakota	WGS84	34.3355	126.702	140
	E.J. van Nieukerken	PreservedSpecimen		Stigmella microtheriella		1	1 male	adult	adult	Russia	Primorye			20 km E Ussurijsk, GTS	R. Puplesis	1982-08-10										S cathepostis det EJvN				RMNH, Naturalis Biodoversity Center	Coll R Puplesis, April 1991					JCK8114			euparal	JC Koster	2013-12-01	1606			google earth		43.692	132.164
	E.J. van Nieukerken	PreservedSpecimen		Stigmella microtheriella		1	1 male	adult	adult	Russia	Primorye			20 km E Ussurijsk, GTS	R. Puplesis	1982-08-13										S cathepostis det EJvN				RMNH, Naturalis Biodoversity Center	Coll R Puplesis, April 1991					JCK8116			euparal	JC Koster	2013-12-01	1606			google earth		43.692	132.164
	E.J. van Nieukerken	PreservedSpecimen		Stigmella microtheriella		1	1 male	adult	adult	Russia	Primorye			20 km E Ussurijsk, GTS	R. Puplesis	1982-08-13										S cathepostis det EJvN				RMNH, Naturalis Biodoversity Center	Coll R Puplesis, April 1991					JCK8117			euparal	JC Koster	2013-12-01	1606			google earth		43.692	132.164
RMNH.INS.24111	E.J. van Nieukerken	PreservedSpecimen	BOLD:AAI0007	Stigmella microtheriella		1	1 female	adult	adult	Germany	Nordrhein-Westfalen			Nationalpark Eifel, Eichenw. Dachslöcher (2a, E/W Dachs)	W. Wittland	2010-06-05														Wittland, W., personal collection						EvN4111		Female genitalia		E.J. van Nieukerken		1103							400
RMNH.INS.29153	E.J. van Nieukerken	PreservedSpecimen		Stigmella microtheriella		1	1 female	adult	larva	Greece	Akhaia			Kalavrita, ca 2.8 km NE, along road	E.J. van Nieukerken & C. Doorenweerd	2011-11-02					EvN2011349	EvN no 2011349-2K					leafmines	dense Carpinus-Ostrya copse		RMNH, Naturalis Biodoversity Center	Tissue collection -80	Carpinus orientalis	Carpinus orientalis		E.J. van Nieukerken										GPS Dakota	WGS84	38.0498	22.1348	710
RMNH.INS.23824	E.J. van Nieukerken	PreservedSpecimen	BOLD:AAI0007	Stigmella microtheriella		1	1 female	adult	adult	Italy	Cuneo			Parco Naturale Alta Valle Pesio, Chiusa di Pesio	G. Baldizzone	2007-07-29													at light	Baldizzone, G., personal collection						EvN3824		Female genitalia	euparal	E.J. van Nieukerken	2008-02-19	0712							600
RMNH.INS.23608	E.J. van Nieukerken	PreservedSpecimen	BOLD:AAI0007	Stigmella microtheriella		1	1 female	adult	adult	Italy	Verona			M Pastello, Ca de la Pela	P. Triberti	2002-05-14													at light	Triberti, P., personal collection						EvN3608		Female genitalia		E.J. van Nieukerken		0412							400
RMNH.INS.24750	E.J. van Nieukerken	PreservedSpecimen		Stigmella microtheriella		1	1 female	adult	larva	Japan	Honshu	Nagano ken	Ohshika-mura	Ohkawara	N. Hirano	2003-10-25			2004-05-20		Hirano-Host-2120								reared from larvae	RMNH, Naturalis Biodoversity Center		Corylus sieboldiana	Corylus sieboldiana			EvN4750		Female genitalia	Euparal	EvN/JCK	2015-12-17	1601			google earth, with Hirano's map		35.559	138.044	700
	E.J. van Nieukerken	PreservedSpecimen		Stigmella microtheriella		4	4 females	adult	larva	Greece	Akhaia			Kalavrita, ca 2.8 km NE, along road	E.J. van Nieukerken & C. Doorenweerd	2011-11-02			2012-04-16	2012-04-18	EvN2011349	EvN no 2011349-2					leafmines	dense Carpinus-Ostrya copse	reared from larvae	RMNH, Naturalis Biodoversity Center		Carpinus orientalis	Carpinus orientalis		E.J. van Nieukerken							1307			GPS Dakota	WGS84	38.0498	22.1348	710
RMNH.INS.29908	E.J. van Nieukerken	PreservedSpecimen	BOLD:ACU6796	Stigmella microtheriella	bit distant	1		larva	leafmine	Azerbaijan		Khachmaz district	Nabran		N. Snegovaya	2009-10-01					Kozlov-72-leaf1	Kozlov-72-leaf1		dried larval remains, extracted destructively						RMNH, Naturalis Biodoversity Center	DNA extract only	Carpinus betulus	Carpinus betulus		M. Kozlov et al												41.764	48.696	-15
RMNH.INS.11264	E.J. van Nieukerken	PreservedSpecimen	BOLD:AAI0007	Stigmella microtheriella		1		larva	larva	Belgium	Luxembourg			Torgny, S. of Virton	E.J. van Nieukerken & T. Jin	1999-10-03					EvN1999244	EvN no 99244M					from leafmines	limestone grassland and forest area	reared from larvae	RMNH, Naturalis Biodoversity Center	DNA extract	Carpinus betulus	Carpinus betulus		E.J. van Nieukerken								31UFQ796873	MGRS			49.5117	5.48112	280
RMNH.INS.11265	E.J. van Nieukerken	PreservedSpecimen	BOLD:AAI0007	Stigmella microtheriella		1		larva	larva	Belgium	Luxembourg			Torgny, S. of Virton	E.J. van Nieukerken & T. Jin	1999-10-03					EvN1999244	EvN no 99244M					from leafmines	limestone grassland and forest area	reared from larvae	RMNH, Naturalis Biodoversity Center	DNA extract	Carpinus betulus	Carpinus betulus		E.J. van Nieukerken								31UFQ796873	MGRS			49.5117	5.48112	280
RMNH.INS.30721	E.J. van Nieukerken	PreservedSpecimen	BOLD:AAI0007	Stigmella microtheriella		1		larva	larva	Canada	Ontario	Huron Co.		Pavilion Rd, picknick site near lake shore	E.J. van Nieukerken	2015-07-23					EvN2015088	EvN no 2015088-1M		taken from mine			leafmines	park with planted trees	reared from larvae	RMNH, Naturalis Biodoversity Center	larval slide + DNA extract	Ostrya virginiana	Ostrya virginiana		E.J. van Nieukerken	RMNH.INS.30721		larval skin	Euparal	Camiel Doorenweerd					GPS Dakota	WGS84	43.511	-81.7107	189
RMNH.INS.18813	E.J. van Nieukerken	PreservedSpecimen	BOLD:AAI0007	Stigmella microtheriella		1		larva	larva	Greece	Akhaia			Kalavrita, ca 2.8 km NE, along road	E.J. van Nieukerken & C. Doorenweerd	2011-11-02					EvN2011349	EvN no 2011349-2M		larva taken from mine			leafmines	dense Carpinus-Ostrya copse	reared from larvae	RMNH, Naturalis Biodoversity Center	DNA extract	Carpinus orientalis	Carpinus orientalis		E.J. van Nieukerken										GPS Dakota	WGS84	38.0498	22.1348	710
RMNH.INS.29918	E.J. van Nieukerken	PreservedSpecimen	BOLD:AAI0007	Stigmella microtheriella	COI det	1		larva	leafmine	Greece	Central Macedonia	Imathia	S of Naousa		Dimitris Zianis	2009-10-11					Kozlov-87-leaf2	Kozlov-87-leaf2		dried larval remains, extracted destructively						RMNH, Naturalis Biodoversity Center	DNA extract only	Carpinus orientalis	Carpinus orientalis		M. Kozlov et al												40.598	22.053	620
RMNH.INS.29748	E.J. van Nieukerken	PreservedSpecimen	BOLD:ACU7085	Stigmella microtheriella		1		larva	larva	Japan	Hokkaido			Higashikawa	C. Doorenweerd & C. van den Berg	2013-09-19					CD13025	CD13025		taken from mine						RMNH, Naturalis Biodoversity Center	DNA extract (+slide)	Betula platyphylla	Betula platyphylla		C. Doorenweerd										GPS	WGS84	43.6247	142.687	450
RMNH.INS.29983	E.J. van Nieukerken	PreservedSpecimen	BOLD:ACU7085	Stigmella microtheriella	COI det	1		larva	larva	Japan	Hokkaido			Rumoi	C. Doorenweerd & C. van den Berg	2013-09-20					CD13036	CD13036		larva in cocoon						RMNH, Naturalis Biodoversity Center	DNA extract (+slide)	Corylus sieboldiana	Corylus sieboldiana		C. Doorenweerd										GPS	WGS84	43.8203	141.833	70
RMNH.INS.30377	E.J. van Nieukerken	PreservedSpecimen	BOLD:ACU7085	Stigmella microtheriella	Barcode identification	1		larva	larva	Japan	Honshu	Gifu pref.	Takayama	Shokawacho Sandani	E.J. van Nieukerken	2014-10-06					EvN2014167	EvN no 2014167-M		cocoon			leafmines in fallen leaves	wet forest along stream		RMNH, Naturalis Biodoversity Center	larval slide + DNA extract	Carpinus	Carpinus	uncertain, fallen leaf	E.J. van Nieukerken	RMNH.INS.30377		larval skin	Euparal	Camiel Doorenweerd					GPS Dakota	WGS84	36.0451	137.006	1040
RMNH.INS.30156	E.J. van Nieukerken	PreservedSpecimen	BOLD:ACU7085	Stigmella microtheriella	barcode det	1		larva	larva	Korea	Jeollabuk-do			Muju-gun, Deogyu-san NP, nr Anguksan temple	E.J. van Nieukerken & S. Richter	2013-10-30					EvN2013160	EvN no 2013160-1M		completely dried out			leafmines	deciduous mountain forest		RMNH, Naturalis Biodoversity Center	larval slide + DNA extract	Carpinus cordata	Carpinus cordata	cf	E.J. van Nieukerken	RMNH.INS.30156		larval skin	Euparal	Camiel Doorenweerd					GPS Dakota	WGS84	35.9439	127.691	943
RMNH.INS.30184	E.J. van Nieukerken	PreservedSpecimen	BOLD:ACU7085	Stigmella microtheriella	barcode det	1		larva	larva	Korea	Jeollanam-do			Wando Island, Hwaheung-ri	E.J. van Nieukerken & S. Richter	2013-11-01					EvN2013181	EvN no 2013181-1M		fresh dead larva			leafmines	mixed Pinus - evergreen-deciduous forest		RMNH, Naturalis Biodoversity Center	larval slide + DNA extract	Carpinus tschonoskii	Carpinus tschonoskii		E.J. van Nieukerken	RMNH.INS.30184		larval skin	Euparal	Camiel Doorenweerd					GPS Dakota	WGS84	34.3355	126.702	140
RMNH.INS.30043	E.J. van Nieukerken	PreservedSpecimen	BOLD:AAI0007	Stigmella microtheriella		1		larva	larva	Netherlands	Zuid-Holland	Zuid-Holland		Leiden: Cronesteyn	C. Doorenweerd et al.	2013-10-13					CD13114	CD13114		taken from mine						RMNH, Naturalis Biodoversity Center	DNA extract (+slide)	Carpinus betulus	Carpinus betulus												GPS	WGS84	52.1414	4.4902
RMNH.INS.18605	E.J. van Nieukerken	PreservedSpecimen	BOLD:AAI0007	Stigmella microtheriella	COI det	1		larva	larva	United States	Vermont	Windsor Co	Weathersfield	Wilgus SP	E.J. van Nieukerken	2011-09-18					EvN2011276	EvN no 2011276M		larva taken from mine			leafmines	dry oak-pine forest	reared from larvae	RMNH, Naturalis Biodoversity Center	DNA extract	Carpinus caroliniana	Carpinus caroliniana		E.J. van Nieukerken										GPS Dakota	WGS84	43.3895	-72.4073	100
RMNH.INS.18172	E.J. van Nieukerken	PreservedSpecimen	BOLD:AAI0007	Stigmella microtheriella		1		larva	larva	United States	Washington	Skamania Co.	Bridge of the Gods	SW Stevenson	E.J. van Nieukerken	2010-07-27					EvN2010053	EvN no 2010053M		cocoon			leafmines	shrub along road	reared from larvae	RMNH, Naturalis Biodoversity Center	DNA extract	Corylus cornuta var. californica	Corylus cornuta var. californica		E.J. van Nieukerken										GPS Map	WGS84	45.6637	-121.905	53
RMNH.INS.12575	E.J. van Nieukerken	PreservedSpecimen	BOLD:AAI0007	Stigmella microtheriella	COI from joha to micr	1		larva	larva	France	Alpes-Maritimes			PN Mercantour, le Boréon, 5.5 km NNE St Martin Vésubie	E.J. van Nieukerken	2007-08-06					EvN2007036	EvN no 2007036-M					leafmines	forest edges in montane forest		RMNH, Naturalis Biodoversity Center	DNA extract	Ostrya carpinifolia	Ostrya carpinifolia		E.J. van Nieukerken							0708			map 1:25.000	WGS84	44.1333	7.28738	1500
RMNH.INS.18146	E.J. van Nieukerken	PreservedSpecimen	BOLD:AAV7002	Stigmella nivenburgensis	barcode det.	1		larva	larva	Bulgaria	Sofia			Zoopark	R. Tomov	2007-10-13								received in 96% EtOH from Rumen Tomov			narrow gallery mine	leafmines		RMNH, Naturalis Biodoversity Center	DNA extract	Salix babylonica	Salix babylonica L
RMNH.INS.18147	E.J. van Nieukerken	PreservedSpecimen	BOLD:AAV7002	Stigmella nivenburgensis	COI det 201304, prev. sp.	1		larva	larva	Bulgaria	Sofia			Zoopark	R. Tomov	2007-10-13								received in 96% EtOH from Rumen Tomov			narrow gallery mine	leafmines		RMNH, Naturalis Biodoversity Center	larval slide + DNA extract	Salix babylonica	Salix babylonica L			RMNH.INS.18147		larval skin	Euparal	Camiel Doorenweerd
RMNH.INS.29891	E.J. van Nieukerken	PreservedSpecimen		Stigmella nivenburgensis	cf	1		larva	leafmine	China	Beijing Shi		Yellow River		Boning Hu	2009-08-29					Kozlov-29-leaf3	Kozlov-29-leaf3		dried larval remains, extracted destructively						RMNH, Naturalis Biodoversity Center	DNA extract only	Salix babylonica	Salix matsudana		M. Kozlov et al												37.766	119.167
RMNH.INS.30088	E.J. van Nieukerken	PreservedSpecimen	BOLD:ACU6572	Stigmella nivenburgensis		1		larva	larva	China	Tianjin			Wuqing county, Dahuangpu wetland	E.J. van Nieukerken & S. Richter	2013-10-22					EvN2013129	EvN no 2013129-1M		larva taken from mine			leafmines	dyke in wetland		RMNH, Naturalis Biodoversity Center	larval slide + DNA extract	Salix babylonica	Salix babylonica		E.J. van Nieukerken	RMNH.INS.30088		larval skin	Euparal	Camiel Doorenweerd					GPS Dakota	WGS84	39.4283	117.254	5
RMNH.INS.12899	E.J. van Nieukerken	PreservedSpecimen	BOLD:AAV7002	Stigmella nivenburgensis	barcode redet from vimineticola	1		larva	larva	France	Alpes-Maritimes			Sospel, 1.5 km E, valley Bevéra	E.J. van Nieukerken & C. Doorenweerd	2008-10-08					EvN2008143	EvN no 2008143M		dead larva			leafmines	forest and shrub in river valley	reared from larvae	RMNH, Naturalis Biodoversity Center	DNA extract	Salix elaeagnos	Salix elaeagnos		E.J. van Nieukerken										GPS	WGS84	43.879	7.46665	330
RMNH.INS.30191	E.J. van Nieukerken	PreservedSpecimen	BOLD:ACU6572	Stigmella nivenburgensis		1		larva	larva	Korea	Gyeongsangbuk-do			Ga-eun, ca 5 km SW	E.J. van Nieukerken	2013-10-29					EvN2013158	EvN no 2013158-M		cocoon			leafmines	Salix shrub in river valley		RMNH, Naturalis Biodoversity Center	larval slide + DNA extract	Salix	Salix		E.J. van Nieukerken	RMNH.INS.30191		larval skin	Euparal	Camiel Doorenweerd					GPS Dakota	WGS84	36.6124	128.023	157
RMNH.INS.12870	E.J. van Nieukerken	PreservedSpecimen	BOLD:AAV7002	Stigmella nivenburgensis	identified by DNA barcode	1		larva	mine and larva	France	Alpes-Maritimes			Saorge, vallée de Roya	E.J. van Nieukerken & C. Doorenweerd	2008-10-09					EvN2008190	EvN no 2008190-2				Stigmella vimineticola	leafmines	river forest		RMNH, Naturalis Biodoversity Center	DNA tissue collection	Salix elaeagnos	Salix elaeagnos		E.J. van Nieukerken							1103			GPS	WGS84	43.9856	7.54759	370
	E.J. van Nieukerken	PreservedSpecimen		Stigmella palionisi		1	1 male	adult	larva	Japan	Hokkaido			Sapporo	S. Nakamura				1981-08-20		Nakamura Host0360	Host 0360			Paratype	Stigmella nakamurai Kemperman & Wilkinson, 1985			reared from larvae	Laboratory of Systematic Entomology, Hokkaido Univversity		Ulmus davidiana var. japonica	Ulmus davidiana v. japonica			VU0780		Male genitalia	euparal
	E.J. van Nieukerken	PreservedSpecimen		Stigmella palionisi		1	1 male	adult	adult	Russia	Primorye			20 km E Ussurijsk, GTS	R. Puplesis	1982-07-21														RMNH, Naturalis Biodoversity Center	Coll R Puplesis, April 1991					JCK8111			euparal	JC Koster	2013-12-01	1312			google earth		43.692	132.164
	E.J. van Nieukerken	PreservedSpecimen		Stigmella palionisi		1	1 male	adult	adult	Russia	Primorye			20 km E Ussurijsk, GTS	R. Puplesis	1982-07-25														RMNH, Naturalis Biodoversity Center	Coll R Puplesis, April 1991					JCK8126			euparal	JC Koster	2013-12-01	1312			google earth		43.692	132.164
	E.J. van Nieukerken	PreservedSpecimen		Stigmella palionisi		1	1 male	adult	adult	Russia	Primorye			20 km E Ussurijsk, GTS	R. Puplesis	1982-07-27														RMNH, Naturalis Biodoversity Center	Coll R Puplesis, April 1991					JCK8181			euparal	JC Koster	2014-04-01	1404			google earth		43.692	132.164
RMNH.INS.24795	E.J. van Nieukerken	PreservedSpecimen		Stigmella pelanodes		1	1 male	adult	adult	Kenya	Kwale			Rivière Ramisi	Ch. Alluaud & R. Jeannel	1911-11-01	1911-11-30	Nov. 1911				St. 8		M647	Holotype	Nepticula pelanodes Meyrick				MNHN, Muséum National d'Histoire Narurelle, Paris						EvN4795		Male genitalia	euparal	E.J. van Nieukerken	2016-02-11	1602			google earth		-4.53	39.42
RMNH.INS.24429	E.J. van Nieukerken	PreservedSpecimen	BOLD:ACG8759	Stigmella perpygmaeella		1	1 male	adult	adult	Greece	Akhaia			Kalavrita, 4.2 km SE, Mt Chelmos	E.J. van Nieukerken & C. Doorenweerd	2011-11-02			2012-03-31	2012-04-02	EvN2011334	EvN no 2011334-1					leafmines	open mountain slopes with isolated trees	reared from larvae	RMNH, Naturalis Biodoversity Center		Crataegus heldreichii	Crataegus heldreichii		E.J. van Nieukerken	EvN4429		Male genitalia	euparal			1307			GPS Dakota	WGS84	38.0081	22.1493	1250
RMNH.INS.24249	E.J. van Nieukerken	PreservedSpecimen	BOLD:ACG8760	Stigmella perpygmaeella		1	1 male	adult	adult	Malta				Naxxar Gap	M. Zerafa				2011-02-19	2011-02-21									reared from larvae	RMNH, Naturalis Biodoversity Center		Crataegus monogyna				EvN4249		Male genitalia		E.J. van Nieukerken		1108			google earth		35.93	14.44
RMNH.INS.23649	E.J. van Nieukerken	PreservedSpecimen	BOLD:AAI0008	Stigmella perpygmaeella		1	1 male	adult	adult	Netherlands	Limburg			Wrakelberg	A. Schreurs	2004-08-08														RMNH, Naturalis Biodoversity Center						EvN3649		Male genitalia		E.J. van Nieukerken		1012
RMNH.INS.23633	E.J. van Nieukerken	PreservedSpecimen	BOLD:ACG8761	Stigmella perpygmaeella		1	1 male	adult	adult	Spain	Baleares			Mallorca: Sa Roca, S. Albufeira	M.J. Honey	2004-10-21														BMNH, Natural History Museum London						EvN3633		Male genitalia		E.J. van Nieukerken		0502
RMNH.INS.23598	E.J. van Nieukerken	PreservedSpecimen	BOLD:AAI0008	Stigmella perpygmaeella		1	1 female	adult	adult	Italy	Asti			Valmanera, Oasi WWF	G. Baldizzone	2004-07-19													at light	Baldizzone, G., personal collection						EvN3598		Female genitalia		E.J. van Nieukerken		0411			google earth		44.937	8.192	130
RMNH.INS.11249	E.J. van Nieukerken	PreservedSpecimen	BOLD:AAI0008	Stigmella perpygmaeella		1		larva	larva	Belgium	Luxembourg			Belvaux, 1 km S: les Pairées	E.J. van Nieukerken & T. Jin	1999-10-03					EvN1999227	EvN no 99227-1M					from leafmines	limestone grassland and forest area	reared from larvae	RMNH, Naturalis Biodoversity Center	larval slide + DNA extract	Crataegus monogyna	Crataegus monogyna		E.J. van Nieukerken	RMNH.INS.11249		larval skin	Euparal	Camiel Doorenweerd			31UFR5652	MGRS			50.0998	5.18134	260
RMNH.INS.18781	E.J. van Nieukerken	PreservedSpecimen	BOLD:AAI0008	Stigmella perpygmaeella		1		larva	larva	Greece	Akhaia			Kalavrita, 4.2 km SE, Mt Chelmos	E.J. van Nieukerken & C. Doorenweerd	2011-11-02					EvN2011334	EvN no 2011334-1M		larva taken from mine			leafmines	open mountain slopes with isolated trees	reared from larvae	RMNH, Naturalis Biodoversity Center	DNA extract	Crataegus heldreichii	Crataegus heldreichii		E.J. van Nieukerken										GPS Dakota	WGS84	38.0081	22.1493	1250
RMNH.INS.11336	E.J. van Nieukerken	PreservedSpecimen	BOLD:AAI0008	Stigmella perpygmaeella		1		larva	larva	Netherlands	Friesland			Terschelling, Midsland Noord	E.J. van Nieukerken	1999-10-20					EvN1999283	EvN no 99283M					leafmines	hedges, cultivated area	reared from larvae	RMNH, Naturalis Biodoversity Center	DNA extract	Crataegus monogyna	Crataegus monogyna		E.J. van Nieukerken								147.9-600.5	Dutch Grid	map		53.392	5.28134
CNCLEP00022614	Wilkinson & Scoble	PreservedSpecimen		Stigmella purpuratella	Stigmella scinanella	1	1 male	adult	adult	Canada	Ontario			Normandale	Freeman & Lewis	1956-07-26			1957-03-20		CNC-56-154	56-154			Holotype	Stigmella scinanella Wilkinson & Scoble, 1979				CNC, Canadian National Collection of Insects etc., Ottawa		Malus pumila	Malus			MIC7102	CNC2972							decimal degrees	google earth	WGS84	42.71	-80.31
	E.J. van Nieukerken	PreservedSpecimen		Stigmella purpuratella		1	1 male	adult	adult	United States	Pennsylvania			Pittsburgh	Engel	1906-05-30									Holotype	Nepticula purpuratella Braun				USNM, United States National History Museum, Smithsonian Institution, Washington DC	N&W say DFF, ninsense according to JFL					CNC3467		Male genitalia		P. Newton		0612
MCZ-ENT00014954	E.J. van Nieukerken	PreservedSpecimen		Stigmella resplendensella		1	1 female	adult	adult	United States	Kentucky			Covington	V.T. Chambers			May 23rd					Type14954		Lectotype	Nepticula resplendensella Chambers	under hackberry trees (Celtis occidentalis)			MCZ, Museum of Comparative Zoology, Harvard University	head and abdomen missing											1608		decimal degrees	google earth	WGS84	39.075	-84.515	165
RMNH.INS.29744	E.J. van Nieukerken	PreservedSpecimen	BOLD:ACG9165	Stigmella sakhalinella		1		larva	larva	Japan	Hokkaido			Higashikawa	C. Doorenweerd & C. van den Berg	2013-09-19					CD13025	CD13025		taken from mine						RMNH, Naturalis Biodoversity Center	DNA extract (+slide)	Betula platyphylla	Betula platyphylla		C. Doorenweerd										GPS	WGS84	43.6247	142.687	450
RMNH.INS.12647	E.J. van Nieukerken	PreservedSpecimen	BOLD:ACG9165	Stigmella sakhalinella		1		larva	larva	Netherlands	Zuid-Holland			Wassenaar, Meijendel	E.J. van Nieukerken	2007-10-11					EvN2007122	EvN no 2007122-1M		larva - left mine			leafmines	dune valley forest	reared from larvae	RMNH, Naturalis Biodoversity Center	larval slide + DNA extract	Betula pubescens	Betula pubescens		E.J. van Nieukerken	RMNH.INS.12647		larval skin	Euparal	Camiel Doorenweerd					GPS	WGS84	52.1374	4.32566
RMNH.INS.24794	E.J. van Nieukerken	PreservedSpecimen		Stigmella tropicatella		1	1 male	adult	adult	Seychelles				Aldabra	M. Gerber	1959-11-10									Paratype	Stigmella tropicatella Legrand				MNHN, Muséum National d'Histoire Narurelle, Paris						EvN4794		Male genitalia	euparal	E.J. van Nieukerken	2016-02-11	1602			google earth		-9.47	46.27
RMNH.INS.24845	E.J. van Nieukerken	PreservedSpecimen		Stigmella tropicatella		1	1 male	adult	adult	Seychelles				Aldabra	M. Gerber	1959-11-15							'197'		Paratype	Stigmella tropicatella Legrand				MNHN, Muséum National d'Histoire Narurelle, Paris						EvN4845		Male genitalia	euparal	E.J. van Nieukerken	2016-05-03	1602			google earth		-9.47	46.27
	E.J. van Nieukerken	PreservedSpecimen		Stigmella tropicatella		1	unknown	adult	adult	Seychelles				Aldabra	M. Gerber	1959-11-11							'197'	specimen almost completly disappeared, only a head on pin	Holotype	Stigmella tropicatella Legrand				MNHN, Muséum National d'Histoire Narurelle, Paris												1602			google earth		-9.47	46.27
	E.J. van Nieukerken	PreservedSpecimen		Stigmella wollofella		1	1 male	adult	adult	Gambia				Gambia river, between Banjul and Basse Santa Su	Gunnar Johansson	1970-12-05								synonymised EJvN 2008	Holotype	Nepticula mandingella Gustafsson		on riverboat M/S Lady Wright in flash light	li	NHRS, Swedish Museum of Natural History, Entomology Collections, Stockholm						NHRS4874		Male genitalia		B. Gustafsson		0803	13.30N-15.18E	Degrees Minutes	Google earth, estimate	WGS84	13.5	15.3
	E.J. van Nieukerken	PreservedSpecimen		Stigmella wollofella		1	1 male	adult	adult	Gambia				Gambia river, between Banjul and Basse Santa Su	Gunnar Johansson	1970-12-05									Holotype	Nepticula wollofella Gustafsson		on riverboat M/S Lady Wright in flash light	li	NHRS, Swedish Museum of Natural History, Entomology Collections, Stockholm						NHRS5103		Male genitalia		B. Gustafsson		0803	13.30N-15.18E	Degrees Minutes	Google earth, estimate	WGS84	13.5	15.3
	E.J. van Nieukerken	PreservedSpecimen		Trifurcula bicolorella		1	1 female	adult	adult	Tunisia				Gafsa	P. Chrétien			en mai [1907-1912]							Holotype	Bucculatrix bicolorella Chrétien				MNHN, Muséum National d'Histoire Narurelle, Paris	coll. Chrétien					Deschka1219		Female genitalia	eukitt	G. Deschka
MCZ-ENT00001302	E.J. van Nieukerken	PreservedSpecimen		Zimmermannia grandisella		1	1 male	adult	adult	United States	Texas	Bosque Co.		Norse	Gustav W. Belfrage								Type1302		Lectotype	Nepticula grandisella Chambers				MCZ, Museum of Comparative Zoology, Harvard University						CNC3495		Male genitalia	Canada balsam	D. Davis		1608		decimal degrees	google earth	WGS84	31.76	-97.67	260
MCZ-ENT00014248	E.J. van Nieukerken	PreservedSpecimen		Zimmermannia obrutella		1	1 male	adult	adult	United States	Texas	Dallas		Dallas	J. Boll			1869-1870					Type14248		Lectotype	Trifurcula obrutella Zeller				MCZ, Museum of Comparative Zoology, Harvard University						DRD2936		Male genitalia	Canada balsam	D. Davis		1608		decimal degrees	google earth	WGS84	32.8	-96.8
[truncated: 12 more columns]
